# Supplementary material for: Comparative and kinetic analysis of viral shedding and immunological responses in MERS patients representing a broad spectrum of disease severity
Source: Springer Nature journal article supplement (doi:10.1038/srep25359), 2016-05-05
Supplement: 41598_2016_BFsrep25359_MOESM197_ESM.pdf [file 41598_2016_BFsrep25359_MOESM197_ESM.pdf]

**Supplementary Data for**

**Comparative and kinetic analysis of viral shedding and immunological responses in MERS patients representing a broad spectrum of disease severity**

Chan-Ki Min<sup>1,2,\*</sup>, Shinye Cheon<sup>3,\*</sup>, Na-Young Ha<sup>1,2,\*</sup>, Kyung Mok Sohn<sup>3,\*</sup>, Yuri Kim<sup>1,2</sup>, Abdimadiyeva Aigerim<sup>1,2</sup>, Hyun Mu Shin<sup>1,2</sup>, Ji-Yeob Choi<sup>2,4</sup>, Kyung-Soo Inn<sup>5</sup>, Jin-Hwan Kim<sup>6</sup>, Jae Young Moon<sup>7</sup>, Myung-Sik Choi<sup>1</sup>, Nam-Hyuk Cho<sup>1,2,8,†</sup> and Yeon-Sook Kim<sup>3,†</sup>

<sup>1</sup>Department of Microbiology and Immunology, Seoul National University College of Medicine, Seoul, Republic of Korea. <sup>2</sup>Department of Biomedical Sciences, Seoul National University College of Medicine, Seoul, Republic of Korea. <sup>3</sup>Division of Infectious Diseases, Department of Internal Medicine, Chungnam National University School of Medicine, Daejeon, Republic of Korea. <sup>4</sup>Cancer Research Institute, Seoul National University College of Medicine, Seoul, Republic of Korea, <sup>5</sup>Department of Pharmaceutical Science, College of Pharmacy, Kyung Hee University, Seoul, Republic of Korea, <sup>6</sup>Department of Radiology, Chungnam National University School of Medicine, Daejeon, Republic of Korea. <sup>7</sup>Division of Pulmonology and Critical Care Medicine, Department of Internal Medicine, Chungnam National University School of Medicine, Daejeon, Republic of Korea. <sup>8</sup>Institute of Endemic Disease, Seoul National University Medical Research Center and Bundang Hospital, Seoul, Republic of Korea.

**Supplementary Fig. S1. Schematic diagram of epidemiological and clinical courses of MERS patients included in this study.**

**Supplementary Fig. S2. Determination of antibody titers of secretory IgA in respiratory samples.** Since there were no negative samples, cut-off values (mean optical densities  $\pm 3 \times$  S.D.) were determined by using the OD values of baselines ( $> 1: 6400$  diluted samples).

**Supplementary Fig. S3. Kinetic responses of cytokines in MERS patients.** Kinetic responses of cytokines not included in Fig. 6 and showed significant upregulation in any of the clinical groups are presented. All these data values are included in Supplementary Table 3. The concentrations of the cytokines are presented in pg/ml. \*: data point is out of x-axis range.

**Supplementary Table S1. Laboratory data for fourteen MERS patients included in this study.** Summary of data from each patient on admission and at acute phase.

**Supplementary Table S2. Summary of anti-viral therapy applied to MERS patients.**

**Supplementary Table S3. Kinetic changes in leukocyte and platelet counts in MERS patients.**

**Supplementary Table S4. Kinetic responses of 39 cytokines, chemokines, and growth factors in MERS patients.**

**Supplementary Table S5. Hazards ratios and 95% confidence intervals of mortality according to the virological and immunological factors.**

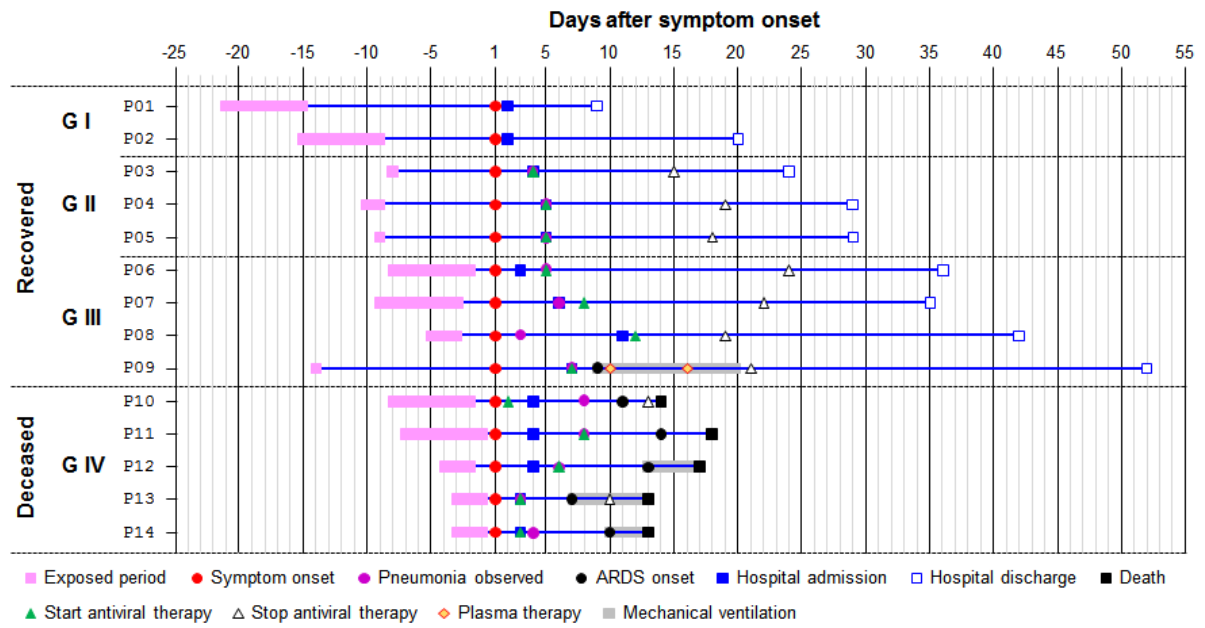

**Supplementary Fig. S1. Schematic diagram of epidemiological and clinical courses of MERS patients included in this study.**

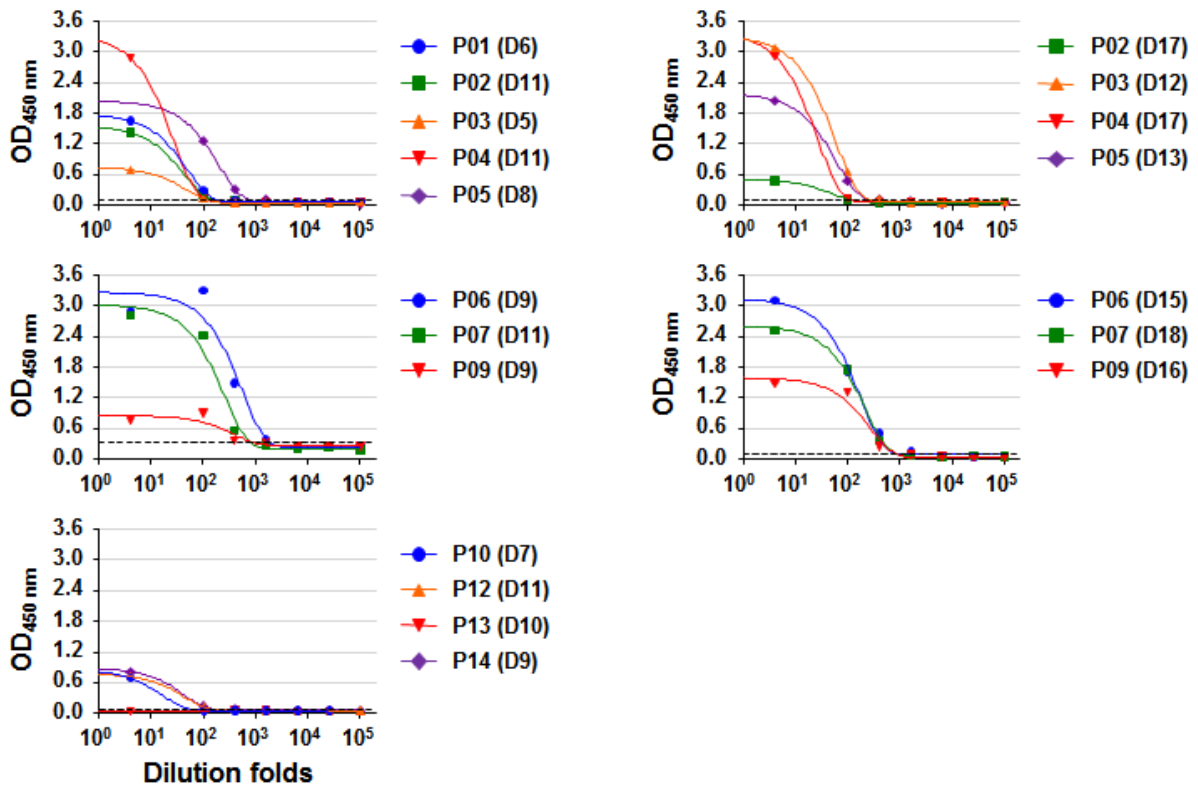

**Supplementary Fig. S2. Determination of antibody titers of secretory IgA in respiratory samples.** Since there were no negative samples, cut-off values (mean optical densities  $\pm 3 \times$  S.D.) were determined by using the OD values of baselines ( $> 1: 6400$  diluted samples).

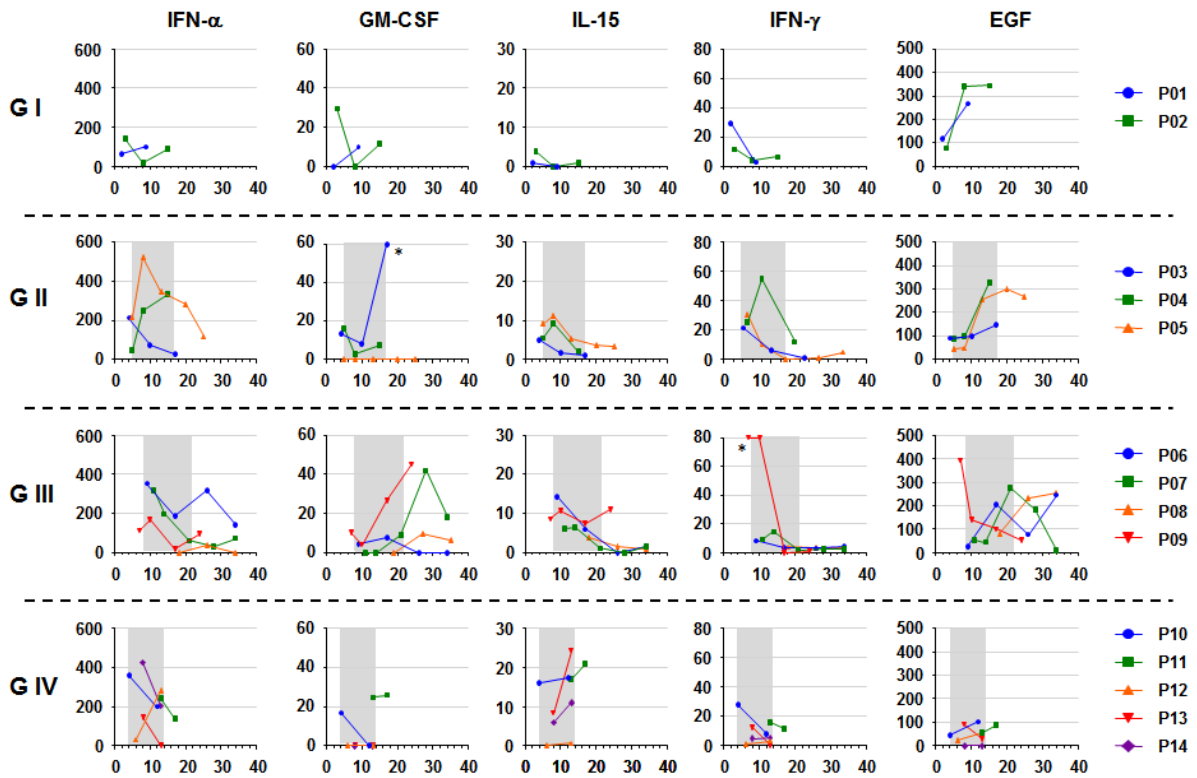

**Supplementary Fig. S3. Kinetic responses of cytokines in MERS patients.** Kinetic responses of cytokines not included in Fig. 6 and showed significant upregulation in any of the clinical groups are presented. All these data values are included in Supplementary Table 3. The concentrations of the cytokines are presented in pg/ml. \*: data point is out of y-axis range.

**Supplementary Table S1. Laboratory data for fourteen MERS patients included in this study.** Summary of data from each patient on admission and at acute phase.

| Group                                | Patient's ID                         | Group I |      |         |      | Group II |      |      |         | Group III |      |         |         | Group IV |       |       |      | Normal range |         |              |                                                                                                                                                                |
|--------------------------------------|--------------------------------------|---------|------|---------|------|----------|------|------|---------|-----------|------|---------|---------|----------|-------|-------|------|--------------|---------|--------------|----------------------------------------------------------------------------------------------------------------------------------------------------------------|
|                                      |                                      | P01     | P02  | Average |      | P03      | P04  | P05  | Average | P06       | P07  | P08     | P09     | Average  | P10   | P11   | P12  |              | P13     | P14          | Average                                                                                                                                                        |
| On admission                         | Days after symptom onset             | D2      | D2   | 4550    | D4   | D5       | D5   | 3300 | D3      | D6        | D12  | D7      | Average | D4       | D5    | D4    | D3   | D3           | D3      | Average      | 3800 - 10000<br>1000 - 4000<br>20 - 51<br>150 - 450<br>135 - 175<br>8 - 20<br>0.8 - 1.2<br>4.0 - 5.0<br>0 - 0.05<br>0 - 37<br>200 - 400<br>30 - 110<br>22 - 51 |
|                                      | Leucocyte (cells/ $\mu$ L)           | 4200    | 4900 | 4550    | 1800 | 4700     | 3400 | 3300 | 2240    | 2000      | 1910 | 4100    | 2633    | 3600     | 6740  | 7000  | 5500 | 8400         | 8400    | 6248         |                                                                                                                                                                |
|                                      | Lymphocyte (cells/ $\mu$ L)          | 1200    | 1600 | 1400    | 800  | 1200     | 600  | 867  | 510     | 600       | 630  | 600     | 585     | 800      | 1190  | 1900  | 200  | 300          | 300     | 878          |                                                                                                                                                                |
|                                      | Lymphocyte (%)                       | 28.6    | 32.7 | 30.6    | 44.4 | 25.5     | 17.6 | 29.2 | 22.8    | 30.0      | 33.0 | 14.6    | 25.1    | 22.2     | 17.6  | 27.1  | 3.6  | 3.5          | 3.5     | 14.8         |                                                                                                                                                                |
|                                      | Platelet (cells $\times 10^3/\mu$ L) | 145     | 166  | 156     | 140  | 257      | 175  | 191  | 118     | 131       | 155  | 165     | 142     | 135      | 233   | 184   | 189  | 111          | 185     | 170          |                                                                                                                                                                |
|                                      | Hemoglobin (g/L)                     | 138     | 127  | 133     | 136  | 117      | 126  | 126  | 129     | 120       | 132  | 115     | 124     | 128      | 121   | 143   | 120  | 143          | 120     | 126          |                                                                                                                                                                |
|                                      | BUN (mg/dl)                          | 10      | 18   | 14      | 5    | 8        | 5    | 6    | 9       | 12        | 12   | 13      | 12      | 11       | 17    | 9     | 20   | 21           | 21      | 16           |                                                                                                                                                                |
|                                      | Cr (mg/dl)                           | 0.86    | 0.56 | 0.81    | 0.45 | 0.49     | 0.56 | 0.50 | 0.67    | 0.67      | 0.77 | 0.56    | 0.67    | 0.88     | 0.97  | 0.88  | 1.16 | 1.16         | 1.19    | 0.98         |                                                                                                                                                                |
|                                      | Albumin (g/dl)                       | 3.6     | 3.5  | 3.6     | 3.9  | 3.1      | 3.1  | 3.4  | 3.3     | 3.3       | 3.5  | 3.1     | 2.6     | 3.1      | 3.4   | 3.2   | 2.3  | 2.6          | 2.5     | 2.7          |                                                                                                                                                                |
|                                      | CRP (mg/dl)                          | 0.5     | 2.7  | 1.6     | 0.5  | 15.1     | 4.7  | 6.8  | 0.05    | 0.05      | 0.7  | 1.5     | 16.9    | 5.7      | 0.5   | 0.7   | 0.5  | 0.7          | 0.5     | 6.2          |                                                                                                                                                                |
|                                      | Procalcitonin (ng/ml)                | -       | -    | -       | 0.05 | -        | -    | 0.05 | 0.05    | 0.05      | -    | 0.34    | 0.89    | 0.43     | -     | 0.74  | 0.07 | -            | 0.52    | 0.44         |                                                                                                                                                                |
|                                      | AST (U/L)                            | 27      | 13   | 20      | 16   | 25       | 105  | 49   | 42      | 42        | 52   | 231     | 31      | 89       | 27    | 41    | 16   | 16           | 21      | 55           |                                                                                                                                                                |
|                                      | ALT (U/L)                            | 13      | 12   | 13      | 10   | 16       | 68   | 31   | 16      | 16        | 25   | 159     | 15      | 46       | 12    | 28    | 29   | 10           | 16      | 19           |                                                                                                                                                                |
|                                      | LDH (U/L)                            | 691     | 270  | 481     | 523  | 488      | 705  | 565  | 430     | 613       | 1587 | 530     | 790     | 384      | 384   | 328   | 419  | 419          | 452     | 390          |                                                                                                                                                                |
| Amylase (U/L)                        | 43                                   | 62      | 53   | 38      | 33   | 74       | 46   | 60   | 66      | 754       | 39   | 235     | 68      | 66       | 78    | 136   | 136  | 53           | 80      |              |                                                                                                                                                                |
| Lipase (U/L)                         | 35                                   | 26      | 31   | 34      | 28   | 41       | 34   | 27   | 27      | 967       | 37   | 265     | 42      | 40       | 35    | 29    | 29   | 19           | 33      |              |                                                                                                                                                                |
| Proteinuria                          | -                                    | trace   | -    | -       | 1+   | 1+       | -    | -    | trace   | 3+        | -    | -       | trace   | -        | -     | -     | -    | 1+           | -       |              |                                                                                                                                                                |
| Arterial blood gas values            |                                      |         |      |         |      |          |      |      |         |           |      |         |         |          |       |       |      |              |         |              |                                                                                                                                                                |
| pH                                   | ND*                                  | ND      | ND   | ND      | 7.40 | ND       | 7.40 | 7.40 | 7.40    | ND        | 7.50 | 7.42    | 7.44    | ND       | 7.40  | 7.40  | 7.34 | 7.43         | 7.39    | 7.35 - 7.45  |                                                                                                                                                                |
| pCO <sub>2</sub> (mmHg)              | ND                                   | ND      | ND   | ND      | 36.0 | ND       | 36.0 | 36.0 | 40.0    | ND        | 28.0 | 28.0    | 31.3    | ND       | 38.0  | 33.0  | 30.0 | 28.0         | 31.8    | 32.0 - 45.0  |                                                                                                                                                                |
| pO <sub>2</sub> (mmHg)               | ND                                   | ND      | ND   | ND      | 73.0 | ND       | 73.0 | 73.0 | 92.0    | ND        | 68.0 | 85.3    | 85.3    | ND       | 87.0  | 74.0  | 97.0 | 56.0         | 78.5    | 75.0 - 100.0 |                                                                                                                                                                |
| HCO <sub>3</sub> (mmol/L)            | ND                                   | ND      | ND   | ND      | 22.3 | ND       | 22.3 | 22.3 | 24.8    | ND        | 20.3 | 18.2    | 21.1    | ND       | 24.0  | 21.9  | 16.6 | 17.3         | 20.0    | 19 - 24      |                                                                                                                                                                |
| O <sub>2</sub> saturation (%)        | ND                                   | ND      | ND   | ND      | 94.0 | ND       | 94.0 | 94.0 | 97.0    | ND        | 98.0 | 94.0    | 96.3    | ND       | 97.0  | 95.0  | 97.0 | 95.0         | 96.0    | 96 - 97      |                                                                                                                                                                |
| Acute phase                          |                                      |         |      |         |      |          |      |      |         |           |      |         |         |          |       |       |      |              |         |              |                                                                                                                                                                |
| Days after symptom onset             | ND                                   | ND      | ND   | D5      | D8   | D8       | 3533 | D6   | D18     | D12       | D9   | Average | D13     | D18      | D17   | D13   | D13  | D13          | Average | 11300        |                                                                                                                                                                |
| Leucocyte (cells/ $\mu$ L)           | 1600                                 | 5300    | 3700 | 1600    | 900  | 400      | 633  | 3000 | 1600    | 1400      | 8140 | 3535    | 5600    | 13800    | 11700 | 15800 | 9800 | 9800         | 11300   |              |                                                                                                                                                                |
| Lymphocyte (cells/ $\mu$ L)          | 600                                  | 900     | 400  | 37.5    | 17.0 | 10.8     | 21.8 | 500  | 200     | 500       | 400  | 400     | 200     | 400      | 500   | 200   | 200  | 100          | 280     |              |                                                                                                                                                                |
| Lymphocyte (%)                       | 37.5                                 | 17.0    | 10.8 | 21.8    | 16.7 | 12.5     | 35.7 | 16.7 | 12.5    | 35.7      | 4.9  | 17.4    | 3.6     | 2.9      | 4.3   | 1.3   | 1.3  | 1.0          | 2.6     |              |                                                                                                                                                                |
| Platelet (cells $\times 10^3/\mu$ L) | 140                                  | 322     | 228  | 140     | 322  | 228      | 220  | 88   | 81      | 163       | 346  | 170     | 146     | 66       | 41    | 66    | 74   | 94           | 84      |              |                                                                                                                                                                |
| Hemoglobin (g/L)                     | 136                                  | 114     | 116  | 136     | 114  | 116      | 122  | 131  | 114     | 134       | 114  | 123     | 128     | 113      | 130   | 126   | 126  | 115          | 122     |              |                                                                                                                                                                |
| BUN (mg/dl)                          | ND                                   | ND      | ND   | 5       | 6    | 6        | 6    | 11   | 8       | 12        | 6    | 9       | 14      | 51       | 21    | 58    | 61   | 61           | 41      |              |                                                                                                                                                                |
| Cr (mg/dl)                           | ND                                   | 0.45    | 0.51 | 0.45    | 0.49 | 0.58     | 0.51 | 0.88 | 0.60    | 0.55      | 0.57 | 0.63    | 0.73    | 1.34     | 0.60  | 1.00  | 1.51 | 1.04         | 1.04    |              |                                                                                                                                                                |
| Albumin (g/dl)                       | ND                                   | 3.8     | 3.1  | 3.8     | 3.1  | 2.8      | 3.2  | 2.7  | 3.0     | 3.1       | 3.0  | 3.0     | 2.3     | 2.8      | 2.1   | 2.5   | 2.5  | 2.9          | 2.5     |              |                                                                                                                                                                |
| CRP (mg/dl)                          | ND                                   | 0.5     | 9.6  | 0.5     | 9.6  | 9.8      | 6.6  | 2.1  | 1.2     | 1.0       | 8.1  | 3.1     | 12.9    | 13.4     | 6.7   | 10.2  | 5.5  | 5.5          | 9.7     |              |                                                                                                                                                                |
| Procalcitonin (ng/ml)                | ND                                   | -       | -    | -       | -    | -        | -    | -    | -       | -         | 56   | 56      | -       | -        | -     | -     | -    | -            | -       |              |                                                                                                                                                                |
| AST (U/L)                            | ND                                   | 14      | 17   | 14      | 17   | 79       | 37   | 141  | 49      | 242       | 79   | 128     | 110     | 77       | 39    | 88    | 88   | 35           | 70      |              |                                                                                                                                                                |
| ALT (U/L)                            | ND                                   | 11      | 14   | 11      | 14   | 55       | 27   | 107  | 30      | 137       | 90   | 83      | 67      | 14       | 13    | 60    | 60   | 31           | 37      |              |                                                                                                                                                                |
| LDH (U/L)                            | ND                                   | 384     | 448  | 384     | 448  | 786      | 539  | 74   | 400     | 1844      | 596  | 979     | 1003    | 1054     | 820   | 1241  | 1241 | 776          | 979     |              |                                                                                                                                                                |
| Amylase (U/L)                        | ND                                   | 41      | 37   | 41      | 37   | 108      | 62   | 53   | 59      | 715       | 76   | 226     | 98      | 279      | 36    | 567   | 393  | 393          | 275     |              |                                                                                                                                                                |
| Lipase (U/L)                         | ND                                   | 42      | 32   | 42      | 32   | 69       | 48   | 36   | 32      | 844       | 48   | 240     | 41      | 179      | 27    | 338   | 338  | 19           | 121     |              |                                                                                                                                                                |
| Proteinuria                          | -                                    | -       | 1+   | -       | -    | 1+       | -    | 3+   | 1+      | 3+        | 2+   | -       | 1+      | 2+       | 2+    | 1+    | 1+   | 1+           | -       |              |                                                                                                                                                                |
| Arterial blood gas values            |                                      |         |      |         |      |          |      |      |         |           |      |         |         |          |       |       |      |              |         |              |                                                                                                                                                                |
| pH                                   | ND                                   | ND      | 7.41 | ND      | ND   | 7.41     | 7.41 | 7.41 | ND      | 7.50      | 7.43 | 7.45    | 7.45    | 7.09     | 7.43  | 7.08  | 7.18 | 7.18         | 7.25    |              |                                                                                                                                                                |
| pCO <sub>2</sub> (mmHg)              | ND                                   | ND      | 33.0 | ND      | ND   | 33.0     | 33.0 | 23.3 | ND      | 28.0      | 13.0 | 20.8    | 29.0    | 67.0     | 58.0  | 95.0  | 59.0 | 59.0         | 61.6    |              |                                                                                                                                                                |
| pO <sub>2</sub> (mmHg)               | ND                                   | ND      | 75.0 | ND      | ND   | 75.0     | 75.0 | 84.0 | ND      | 96.0      | 71.0 | 83.7    | 42.0    | 46.0     | 85.0  | 43.0  | 35.0 | 35.0         | 50.2    |              |                                                                                                                                                                |
| HCO <sub>3</sub> (mmol/L)            | ND                                   | ND      | 21.9 | ND      | ND   | 21.9     | 21.9 | 22.2 | ND      | 20.3      | 19.5 | 20.7    | 20.2    | 20.3     | 38.5  | 28.2  | 22.0 | 22.0         | 25.8    |              |                                                                                                                                                                |
| O <sub>2</sub> saturation (%)        | ND                                   | ND      | 95.0 | ND      | ND   | 95.0     | 95.0 | 96.0 | ND      | 98.0      | 95.0 | 96.3    | 80.0    | 63.0     | 97.0  | 57.0  | 50.0 | 50.0         | 69.4    |              |                                                                                                                                                                |

**Supplementary Table S2. Summary of anti-viral therapy applied to MERS patients.**

| Anti-viral Therapy**    | Patient's ID. |     |                       |          |          |              |          |           |          |          |          |          |          |          |
|-------------------------|---------------|-----|-----------------------|----------|----------|--------------|----------|-----------|----------|----------|----------|----------|----------|----------|
|                         | P01           | P02 | P03                   | P04      | P05      | P06          | P07      | P08       | P09      | P10      | P11      | P12      | P13      | P14      |
| Pegylated IFN- $\alpha$ | -             | -   | D4 <sup>†</sup> , D11 | D6, D13  | D5, D12  | D5, D12, D19 | D8, D15  | D12, D19  | D7, D14  | D9       | D8, D15  | D6, D13  | D3, D10  | D4, D10  |
| Ribavirin               | -             | -   | D4 ~ D15              | D6 ~ D18 | D5 ~ D18 | D5 ~ D24     | D8 ~ D21 | D12 ~ D19 | D7 ~ D13 | D4 ~ D13 | D6 ~ D17 | D6 ~ D17 | D3 ~ D7  | D3 ~ D13 |
| lopinavir/ritonavir     | -             | -   | D4 ~ D15              | D6 ~ D18 | D5 ~ D18 | -            | D8 ~ D13 | -         | D7 ~ D22 | D4 ~ D13 | D8 ~ D17 | D6 ~ D17 | D8 ~ D13 | D8 ~ D13 |
| Anti-viral plasma**     | -             | -   | -                     | -        | -        | -            | -        | -         | D10, D16 | -        | -        | -        | -        | -        |

<sup>†</sup> Days after symptom onset.

\*\* IFN- $\alpha$ 2a (180  $\mu$ g/week); Ribavirin (400 – 1200 mg, three times a day); lopinavir/ritonavir (400/100 mg PO every 12h)

\*\*\* anti-S1 IgG level: 3.97 unit/ml

Supplementary Table S3. Kinetic changes in leukocyte and platelet counts in MERS patients.

| Patient's ID.   | Days after symptom onset    | Normal range |      |      |       |      |      |      |       |       |       |       |      |      |      |      |      |      |      |      |      |
|-----------------|-----------------------------|--------------|------|------|-------|------|------|------|-------|-------|-------|-------|------|------|------|------|------|------|------|------|------|
|                 |                             | 2            | 3    | 4    | 8     |      |      |      |       |       |       |       |      |      |      |      |      |      |      |      |      |
| P01             | Hb (g/dl)                   | 13.8         | 13.5 | 14.3 | 14.1  |      |      |      |       |       |       |       |      |      |      |      |      |      |      |      |      |
|                 | PLT (x 10 <sup>3</sup> /μl) | 145          | 159  | 155  | 305   |      |      |      |       |       |       |       |      |      |      |      |      |      |      |      |      |
|                 | WBC (μl)                    | 4200         | 4300 | 5100 | 7300  |      |      |      |       |       |       |       |      |      |      |      |      |      |      |      |      |
|                 | neutrophil (μl)             | 2356         | 2498 | 3254 | 4424  |      |      |      |       |       |       |       |      |      |      |      |      |      |      |      |      |
|                 | lymphocyte (μl)             | 1193         | 1195 | 1244 | 2132  |      |      |      |       |       |       |       |      |      |      |      |      |      |      |      |      |
|                 | monocyte (μl)               | 592          | 559  | 520  | 642   |      |      |      |       |       |       |       |      |      |      |      |      |      |      |      |      |
|                 | neutrophils (%)             | 56.1         | 58.1 | 64.4 | 60.6  |      |      |      |       |       |       |       |      |      |      |      |      |      |      |      |      |
| lymphocytes (%) | 28.4                        | 27.8         | 24.4 | 29.2 |       |      |      |      |       |       |       |       |      |      |      |      |      |      |      |      |      |
| monocytes (%)   | 14.1                        | 13           | 10.2 | 8.8  |       |      |      |      |       |       |       |       |      |      |      |      |      |      |      |      |      |
| P02             | Days after symptom onset    |              |      |      |       |      |      |      |       |       |       |       |      |      |      |      |      |      |      |      |      |
|                 | 2                           | 3            | 4    | 5    | 6     | 7    | 8    | 9    | 10    | 11    | 12    | 13    | 14   | 15   | 16   | 17   | 18   |      |      |      |      |
|                 | Hb (g/dl)                   | 12.7         | 13.4 | 13   | 12.9  | 12   | 11.8 | 12.1 | 12    | 13.6  | 12.6  | 12.1  |      |      |      |      |      |      |      |      |      |
|                 | PLT (x 10 <sup>3</sup> /μl) | 166          | 188  | 201  | 203   | 223  | 231  | 262  | 280   | 312   | 294   | 280   |      |      |      |      |      |      |      |      |      |
|                 | WBC (μl)                    | 4900         | 5200 | 5500 | 4700  | 4800 | 4500 | 5200 | 6000  | 7120  | 7000  | 5600  |      |      |      |      |      |      |      |      |      |
|                 | neutrophil (μl)             | 2818         | 2980 | 3427 | 2491  | 2654 | 2448 | 2881 | 3600  | 4286  | 4767  | 3517  |      |      |      |      |      |      |      |      |      |
|                 | lymphocyte (μl)             | 1632         | 1804 | 1639 | 1814  | 1829 | 1625 | 1830 | 1794  | 2342  | 1736  | 1635  |      |      |      |      |      |      |      |      |      |
| monocyte (μl)   | 328                         | 281          | 297  | 244  | 245   | 239  | 265  | 312  | 292   | 280   | 241   |       |      |      |      |      |      |      |      |      |      |
| neutrophils (%) | 57.5                        | 57.3         | 62.3 | 53   | 53.2  | 54.4 | 55.4 | 60   | 60.2  | 68.1  | 62.8  |       |      |      |      |      |      |      |      |      |      |
| lymphocytes (%) | 33.3                        | 34.7         | 29.8 | 38.6 | 38.1  | 36.1 | 35.2 | 29.9 | 32.9  | 24.8  | 29.2  |       |      |      |      |      |      |      |      |      |      |
| monocytes (%)   | 6.7                         | 6.4          | 6.4  | 6.2  | 5.1   | 5.3  | 5.1  | 5.2  | 4.1   | 5.1   | 4.3   |       |      |      |      |      |      |      |      |      |      |
| P03             | Days after symptom onset    |              |      |      |       |      |      |      |       |       |       |       |      |      |      |      |      |      |      |      |      |
|                 | 4                           | 5            | 6    | 7    | 8     | 9    | 10   | 11   | 12    | 13    | 14    | 15    | 16   | 17   | 18   | 19   |      |      |      |      |      |
|                 | Hb (g/dl)                   | 13.6         | 13.8 | 13.6 | 13.3  | 13.1 | 13.4 | 12.9 | 12.4  | 12.4  | 12.1  | 12.8  | 12.9 | 12.3 | 12.7 | 11.7 |      |      |      |      |      |
|                 | PLT (x 10 <sup>3</sup> /μl) | 140          | 128  | 123  | 134   | 160  | 201  | 230  | 278   | 331   | 399   | 427   | 440  | 456  | 493  | 428  |      |      |      |      |      |
|                 | WBC (μl)                    | 1600         | 1600 | 9900 | 8220  | 5300 | 2700 | 2700 | 2400  | 2200  | 3700  | 3500  | 2900 | 2800 | 3200 | 3000 |      |      |      |      |      |
|                 | neutrophil (μl)             | 639          | 611  | 3583 | 6732  | 4060 | 1658 | 1787 | 1274  | 1210  | 2279  | 2170  | 1572 | 1590 | 1776 | 1526 |      |      |      |      |      |
|                 | lymphocyte (μl)             | 903          | 846  | 1000 | 1192  | 954  | 772  | 581  | 732   | 755   | 858   | 816   | 902  | 893  | 1085 | 1092 |      |      |      |      |      |
| monocyte (μl)   | 148                         | 130          | 317  | 288  | 265   | 251  | 302  | 346  | 165   | 463   | 448   | 377   | 269  | 310  | 242  |      |      |      |      |      |      |
| neutrophils (%) | 46.6                        | 38.2         | 86.7 | 81.9 | 76.6  | 61.4 | 66.2 | 53.1 | 55    | 61.6  | 62    | 54.2  | 96.8 | 55.5 | 54.2 |      |      |      |      |      |      |
| lymphocytes (%) | 44.6                        | 52.9         | 10.1 | 14.5 | 18    | 28.6 | 21.5 | 30.5 | 34.3  | 23.2  | 23.3  | 31.1  | 31.9 | 33.9 | 36.4 |      |      |      |      |      |      |
| monocytes (%)   | 8.2                         | 8.1          | 3.2  | 3.5  | 5.3   | 9.3  | 11.2 | 14.4 | 7.5   | 12.5  | 12.8  | 13    | 9.6  | 9.7  | 8.1  |      |      |      |      |      |      |
| P04             | Days after symptom onset    |              |      |      |       |      |      |      |       |       |       |       |      |      |      |      |      |      |      |      |      |
|                 | 5                           | 6            | 7    | 8    | 9     | 10   | 11   | 12   | 13    | 14    | 15    | 16    | 17   | 18   | 20   | 22   | 24   |      |      |      |      |
|                 | Hb (g/dl)                   | 11.7         | 11.4 | 10.9 | 11.4  | 11.2 | 11.3 | 11.5 | 11.6  | 10.8  | 11.3  | 10.6  | 10.9 | 10.7 | 10.8 | 10.1 | 10.1 |      |      |      |      |
|                 | PLT (x 10 <sup>3</sup> /μl) | 257          | 322  | 330  | 343   | 427  | 457  | 525  | 493   | 502   | 405   | 385   | 332  | 328  | 278  | 257  | 217  |      |      |      |      |
|                 | WBC (μl)                    | 4700         | 4300 | 4300 | 4300  | 4600 | 4800 | 4000 | 3200  | 4300  | 4400  | 4100  | 3600 | 4200 | 4000 | 3900 | 3600 |      |      |      |      |
|                 | neutrophil (μl)             | 3304         | 3297 | 3682 | 4737  | 2594 | 2486 | 1692 | 966   | 2189  | 2270  | 2189  | 1193 | 1202 | 1256 | 1300 | 1259 | 1040 |      |      |      |
|                 | lymphocyte (μl)             | 1161         | 1489 | 941  | 980   | 1490 | 1819 | 1844 | 1840  | 1733  | 1694  | 1427  | 2464 | 2027 | 2482 | 2248 | 2193 | 2149 |      |      |      |
| monocyte (μl)   | 207                         | 445          | 499  | 415  | 432   | 365  | 372  | 346  | 292   | 326   | 373   | 332   | 270  | 332  | 308  | 269  | 234  |      |      |      |      |
| neutrophils (%) | 70.3                        | 62.2         | 70.8 | 76.4 | 56.4  | 51.8 | 42.2 | 30.2 | 50.9  | 51.5  | 53.4  | 31.1  | 33.4 | 29.9 | 32.5 | 33.3 | 28.9 |      |      |      |      |
| lymphocytes (%) | 24.7                        | 28.1         | 18.1 | 15.8 | 32.4  | 37.9 | 46.1 | 67.5 | 40.3  | 38.5  | 34.8  | 60.1  | 65.3 | 69.1 | 66.2 | 65.2 | 59.7 |      |      |      |      |
| monocytes (%)   | 4.4                         | 8.4          | 9.6  | 6.7  | 9.4   | 7.6  | 9.3  | 10.8 | 6.8   | 7.4   | 9.1   | 8.1   | 7.5  | 7.9  | 7.7  | 6.9  | 6.5  |      |      |      |      |
| P05             | Days after symptom onset    |              |      |      |       |      |      |      |       |       |       |       |      |      |      |      |      |      |      |      |      |
|                 | 5                           | 6            | 7    | 8    | 9     | 10   | 11   | 12   | 13    | 14    | 15    | 16    | 17   | 18   | 20   | 22   | 24   |      |      |      |      |
|                 | Hb (g/dl)                   | 12.6         | 11.7 | 11.6 | 11.6  | 12.6 | 12.2 | 12.2 | 11.8  | 11.5  | 11.6  | 12    | 11   | 11.6 | 10.6 | 10.7 | 10.8 | 9.8  |      |      |      |
|                 | PLT (x 10 <sup>3</sup> /μl) | 175          | 149  | 204  | 222   | 371  | 371  | 385  | 401   | 425   | 458   | 389   | 330  | 331  | 420  | 416  | 356  |      |      |      |      |
|                 | WBC (μl)                    | 3400         | 4400 | 3700 | 4400  | 4800 | 4000 | 3800 | 4350  | 3900  | 3800  | 2800  | 3300 | 2600 | 3100 | 3400 | 3400 | 3100 |      |      |      |
|                 | neutrophil (μl)             | 2615         | 3480 | 2738 | 3705  | 3917 | 3260 | 2820 | 2984  | 2968  | 2827  | 1722  | 2241 | 1342 | 860  | 1309 | 1649 | 1593 |      |      |      |
|                 | lymphocyte (μl)             | 561          | 576  | 692  | 466   | 552  | 504  | 657  | 835   | 445   | 509   | 633   | 627  | 660  | 1646 | 1482 | 1221 | 1026 |      |      |      |
| monocyte (μl)   | 211                         | 354          | 252  | 207  | 149   | 212  | 300  | 492  | 417   | 398   | 400   | 393   | 572  | 552  | 575  | 473  | 446  |      |      |      |      |
| neutrophils (%) | 76.9                        | 79.1         | 74   | 84.2 | 81.6  | 81.6 | 74.2 | 68.6 | 76.1  | 74.4  | 61.6  | 67.9  | 51.6 | 28.4 | 38.5 | 48.5 | 50.1 |      |      |      |      |
| lymphocytes (%) | 16.5                        | 13.1         | 18.7 | 10.6 | 11.5  | 12.6 | 17.3 | 19.2 | 11.4  | 13.4  | 22.6  | 19    | 25.4 | 53.1 | 43.6 | 35.9 | 33.1 |      |      |      |      |
| monocytes (%)   | 6.2                         | 7.6          | 6.8  | 4.7  | 3.1   | 5.3  | 7.9  | 11.3 | 10.7  | 10.2  | 14.3  | 11.9  | 22   | 17.8 | 16.9 | 13.9 | 14.4 |      |      |      |      |
| P06             | Days after symptom onset    |              |      |      |       |      |      |      |       |       |       |       |      |      |      |      |      |      |      |      |      |
|                 | 4                           | 5            | 6    | 7    | 8     | 9    | 10   | 11   | 12    | 13    | 14    | 15    | 16   | 17   | 18   | 20   | 22   | 24   | 27   |      |      |
|                 | Hb (g/dl)                   | 12.9         | 14   | 14   | 13.9  | 13.9 | 13.1 | 13.7 | 14.1  | 12.8  | 12.7  | 12.5  | 12.2 | 11.9 | 11.6 | 11   | 11   | 12.1 | 11.1 |      |      |
|                 | PLT (x 10 <sup>3</sup> /μl) | 118          | 99   | 90   | 77    | 76   | 88   | 103  | 122   | 123   | 131   | 139   | 146  | 155  | 99   | 108  | 126  | 102  | 138  |      |      |
|                 | WBC (μl)                    | 2240         | 3000 | 1700 | 10000 | 8700 | 3000 | 1400 | 14200 | 10000 | 4800  | 2800  | 2300 | 3100 | 1900 | 1400 | 4800 | 2400 | 2800 |      |      |
|                 | neutrophil (μl)             | 1496         | 1424 | 923  | 9050  | 8004 | 2328 | 720  | 13618 | 9190  | 3898  | 1814  | 1463 | 1721 | 1032 | 706  | 3950 | 1471 | 1145 |      |      |
|                 | lymphocyte (μl)             | 511          | 688  | 559  | 620   | 513  | 468  | 494  | 525   | 630   | 566   | 566   | 481  | 694  | 496  | 374  | 379  | 410  | 1014 |      |      |
| monocyte (μl)   | 199                         | 184          | 113  | 174  | 149   | 150  | 13   | 153  | 133   | 122   | 128   | 138   | 138  | 340  | 301  | 461  | 494  | 468  |      |      |      |
| neutrophils (%) | 66.8                        | 61.9         | 54.3 | 90.5 | 92    | 77.6 | 51.4 | 95.9 | 91.9  | 81.2  | 64.8  | 63.6  | 55.5 | 54.3 | 50.4 | 82.3 | 61.3 | 40.9 |      |      |      |
| lymphocytes (%) | 22.8                        | 29.9         | 32.9 | 6.2  | 5.9   | 15.6 | 35.3 | 3.7  | 6.3   | 11.8  | 20.2  | 20.9  | 22.4 | 26.1 | 26.7 | 7.9  | 17.1 | 36.2 |      |      |      |
| monocytes (%)   | 7.1                         | 8            | 12.5 | 3.3  | 2     | 6.3  | 11.8 | 0.3  | 1.5   | 6.7   | 14.2  | 14.7  | 20.5 | 17.9 | 21.5 | 9.6  | 20.6 | 16.7 |      |      |      |
| P07             | Days after symptom onset    |              |      |      |       |      |      |      |       |       |       |       |      |      |      |      |      |      |      |      |      |
|                 | 6                           | 7            | 8    | 9    | 10    | 11   | 12   | 13   | 14    | 15    | 16    | 17    | 18   | 19   | 21   | 23   | 25   | 27   | 30   | 33   |      |
|                 | Hb (g/dl)                   | 12           | 11.3 | 11.4 | 11.4  | 11.9 | 12.6 | 12.8 | 11.3  | 12.8  | 13.6  | 10.9  | 10.1 | 9.5  | 8.1  | 10.2 | 10.4 | 11.5 | 10.9 | 11.4 | 11.2 |
|                 | PLT (x 10 <sup>3</sup> /μl) | 131          | 83   | 81   | 88    | 100  | 126  | 138  | 117   | 106   | 120   | 187   | 211  | 251  | 315  | 377  | 417  | 419  | 358  | 311  | 253  |
|                 | WBC (μl)                    | 2000         | 1600 | 1600 | 1700  | 1500 | 2400 | 1800 | 1800  | 1900  | 1600  | 2700  | 2300 | 2080 | 1600 | 1900 | 2400 | 2300 | 2400 | 2500 | 2380 |
|                 | neutrophil (μl)             | 1208         | 779  | 846  | 981   | 1000 | 948  | 1483 | 1354  | 1549  | 1245  | 2138  | 1757 | 1387 | 707  | 874  | 1027 | 906  | 986  | 1233 | 1031 |
|                 | lymphocyte (μl)             | 642          | 661  | 638  | 533   | 564  | 629  | 434  | 395   | 268   | 334   | 422   | 437  | 528  | 661  | 676  | 1026 | 1051 | 903  | 990  |      |
| monocyte (μl)   | 150                         | 118          | 107  | 80   | 128   | 60   | 120  | 106  | 143   | 110   | 159   | 147   | 227  | 240  | 327  | 439  | 331  | 326  | 298  | 309  |      |
| neutrophils (%) | 60.4                        | 48.7         | 52.9 | 61.3 | 58.8  | 63.2 | 76.8 | 75.2 | 81.5  | 77.8  | 79.2  | 76.4  | 66.7 | 44.2 | 46   | 42.8 | 39.4 | 41.1 | 49.3 | 43.3 |      |
| lymphocytes (%) | 32.1                        | 43.2         | 39.9 | 33.3 | 33.2  | 32.6 | 18.1 | 18.6 | 10.9  | 15    | 14.7  | 16.6  | 21.1 | 39.1 | 34.8 | 36.5 | 44.6 | 44.2 | 36.1 | 41.6 |      |
| monocytes (%)   | 7.5                         | 7.4          | 6.7  | 5.5  | 5.4   | 5.3  | 5.9  | 2.5  | 6.9   | 5.3   | 6.4   | 10.9  | 9.5  | 16   | 17.2 | 18.3 | 14.4 | 13.6 | 11.9 | 13   |      |
| P08             | Days after symptom onset    |              |      |      |       |      |      |      |       |       |       |       |      |      |      |      |      |      |      |      |      |
|                 | 12                          | 13           | 14   | 15   | 16    | 17   | 18   | 19   | 20    | 21    | 22    | 23    | 28   |      |      |      |      |      |      |      |      |
|                 | Hb (g/dl)                   | 13.2         | 13.7 | 12.1 | 12.9  | 12.9 | 13   | 13.2 | 12.4  | 12.5  | 12.3  | 12.7  | 11.7 | 12.3 |      |      |      |      |      |      |      |
|                 | PLT (x 10 <sup>3</sup> /μl) | 155          | 167  | 179  | 204   | 225  | 260  | 277  | 294   | 348   | 357   | 398   | 410  | 403  |      |      |      |      |      |      |      |
|                 | WBC (μl)                    | 1910         | 7700 | 9300 | 6200  | 5200 | 7400 | 9000 | 9100  | 8200  | 8900  | 7900  | 5000 | 5200 |      |      |      |      |      |      |      |
|                 | neutrophil (μl)             | 1117         | 7951 | 3351 | 5134  | 4118 | 6065 | 7200 | 7586  | 5890  | 5478  | 5270  | 3401 |      |      |      |      |      |      |      |      |
|                 | lymphocyte (μl)             | 623          | 747  | 632  | 670   | 614  | 614  | 637  | 683   | 689   | 1015  | 1122  | 1160 | 1389 |      |      |      |      |      |      |      |
| monocyte (μl)   | 166                         | 262          | 307  | 391  | 442   | 659  | 909  | 974  | 1099  | 970   | 869   | 540   | 281  |      |      |      |      |      |      |      |      |
| neutrophils (%) | 58.5                        | 86.9         | 89.8 | 82.8 | 79.2  | 82.4 | 80   | 81.3 | 78    | 77.3  | 74.4  | 65.4  | 55.4 |      |      |      |      |      |      |      |      |
| lymphocytes (%) | 32.6                        | 9.7          | 6.8  | 10.8 | 11.8  | 8.3  | 9.3  | 7.5  | 8.4   | 11.4  | 14.2  | 23.2  | 26.9 |      |      |      |      |      |      |      |      |
| monocytes (%)   | 8.7                         | 3.4          | 3.3  | 6.3  | 8.5   | 8.9  | 10.1 | 10.7 | 13.4  | 10.9  | 11    | 10.8  | 16.4 |      |      |      |      |      |      |      |      |
| P09             | Days after symptom onset    |              |      |      |       |      |      |      |       |       |       |       |      |      |      |      |      |      |      |      |      |
|                 | 7                           | 8            | 9    | 10   | 11    | 12   | 13   | 14   | 15    | 16    | 17    | 18    | 19   | 20   | 22   | 24   | 26   | 28   | 31   | 34   |      |
|                 | Hb (g/dl)                   | 11.5         | 9.9  | 9.8  | 15.4  | 13.5 | 12.9 | 12.8 | 12.3  | 12    | 8.4   | 11.2  | 10.4 | 9.8  | 11.5 | 10.4 | 9.2  | 8.4  | 9.7  | 8.9  | 9.2  |
|                 | PLT (x 10 <sup>3</sup> /μl) | 165          | 157  | 177  | 95    | 81   | 62   | 68   | 70    | 73    | 134   | 121   | 146  | 114  | 133  | 198  | 190  | 199  | 203  | 157  | 129  |
|                 | WBC (μl)                    | 4100         | 5600 | 4400 | 6400  | 7800 | 6100 | 7300 | 9000  | 15000 | 14200 | 14200 |      |      |      |      |      |      |      |      |      |
